# Supplementary material for: Socioeconomic inequalities of Long COVID: a retrospective population-based cohort study in the United Kingdom
Source: PubMed Central journal article supplement — J R Soc Med. 2023 May 10;116(8):263–73. doi: 10.1177/01410768231168377 (PMC10469969; doi:10.1177/01410768231168377), 2023-05-10
Supplement: sj-pdf-1-jrs-10.1177_01410768231168377.pdf [file sj-pdf-1-jrs-10.1177_01410768231168377.pdf]

# Socioeconomic inequalities of Long COVID: a retrospective population-based cohort study in the United Kingdom

## Supplementary Material

|                                                                                                                                                                            |    |
|----------------------------------------------------------------------------------------------------------------------------------------------------------------------------|----|
| Figures                                                                                                                                                                    | 2  |
| Figure S1: Long COVID symptoms in the survey questionnaire.                                                                                                                | 2  |
| Tables                                                                                                                                                                     | 3  |
| Table S1: The distribution of missing data for select covariates.                                                                                                          | 3  |
| Table S2: Occupation groups listed in the survey questionnaire.                                                                                                            | 4  |
| Table S3: IMD distribution among participants who were included in the main analysis vs those who were excluded due to not having any visits 4 weeks after COVID-19        | 5  |
| Table S4: Number of participants experiencing Long COVID at least 4 weeks after having COVID-19, by IMD deciles.                                                           | 6  |
| Table S5: Number of participants experiencing Long COVID at least 4 weeks after having COVID-19 by IMD deciles and occupational groups.                                    | 7  |
| Table S6: Association between deprivation and experiencing Long COVID at least 4 weeks after having COVID-19, for participants residing in England.                        | 8  |
| Table S7: Association between deprivation and experiencing Long COVID at least 4 weeks after having COVID-19, using random-effects at country level.                       | 9  |
| Table S8: Association between deprivation and experiencing Long COVID at least 4 weeks after having COVID-19, excluding those who only had self-reported COVID-19 results. | 10 |

## Figures

**Figure S1: Long COVID symptoms in the survey questionnaire.**

|                                                                                                                                                                                                                                                                          |                                                                                                     |                                                                                         |
|--------------------------------------------------------------------------------------------------------------------------------------------------------------------------------------------------------------------------------------------------------------------------|-----------------------------------------------------------------------------------------------------|-----------------------------------------------------------------------------------------|
| 5. Would you describe yourself as having "long COVID", that is, you are still experiencing symptoms more than 4 weeks after you first had COVID-19, that are not explained by something else? <input type="checkbox"/> Yes <input type="checkbox"/> No                   |                                                                                                     |                                                                                         |
| <i>If yes:</i> (a) Does this reduce your ability to carry-out day-to-day activities compared with the time before you had COVID-19? ( <i>select one</i> ) <input type="checkbox"/> Yes, a lot <input type="checkbox"/> Yes, a little <input type="checkbox"/> Not at all |                                                                                                     |                                                                                         |
| (b) Have you had any of the following symptoms as part of your experience of long COVID? Please include any pre-existing symptoms which long COVID has made worse (answer Yes or No for each one)                                                                        |                                                                                                     |                                                                                         |
| Fever (including high temperature) <input type="checkbox"/> Yes <input type="checkbox"/> No                                                                                                                                                                              | Headache <input type="checkbox"/> Yes <input type="checkbox"/> No                                   | Muscle ache <input type="checkbox"/> Yes <input type="checkbox"/> No                    |
| Weakness/tiredness <input type="checkbox"/> Yes <input type="checkbox"/> No                                                                                                                                                                                              | Nausea/vomiting <input type="checkbox"/> Yes <input type="checkbox"/> No                            | Abdominal pain <input type="checkbox"/> Yes <input type="checkbox"/> No                 |
| Diarrhoea <input type="checkbox"/> Yes <input type="checkbox"/> No                                                                                                                                                                                                       | Loss of appetite or eating less than usual <input type="checkbox"/> Yes <input type="checkbox"/> No | Loss of taste <input type="checkbox"/> Yes <input type="checkbox"/> No                  |
| Loss of smell <input type="checkbox"/> Yes <input type="checkbox"/> No                                                                                                                                                                                                   | Sore throat <input type="checkbox"/> Yes <input type="checkbox"/> No                                | Cough <input type="checkbox"/> Yes <input type="checkbox"/> No                          |
| Shortness of breath <input type="checkbox"/> Yes <input type="checkbox"/> No                                                                                                                                                                                             | Chest pain <input type="checkbox"/> Yes <input type="checkbox"/> No                                 | Palpitations <input type="checkbox"/> Yes <input type="checkbox"/> No                   |
| Vertigo/dizziness <input type="checkbox"/> Yes <input type="checkbox"/> No                                                                                                                                                                                               | Worry/anxiety <input type="checkbox"/> Yes <input type="checkbox"/> No                              | Low mood/not enjoying anything <input type="checkbox"/> Yes <input type="checkbox"/> No |
| More trouble sleeping than usual <input type="checkbox"/> Yes <input type="checkbox"/> No                                                                                                                                                                                | Memory loss or confusion <input type="checkbox"/> Yes <input type="checkbox"/> No                   | Difficulty concentrating <input type="checkbox"/> Yes <input type="checkbox"/> No       |
| Runny nose/sneezing <input type="checkbox"/> Yes <input type="checkbox"/> No                                                                                                                                                                                             | Noisy breathing (wheezing) <input type="checkbox"/> Yes <input type="checkbox"/> No                 |                                                                                         |

Reference: <https://www.ndm.ox.ac.uk/covid-19/covid-19-infection-survey/case-record-forms?d3742abe-11b5-11ed-ab39-06d04f560572>.

## Tables

**Table S1: The distribution of missing data for select covariates.**

| <b>Variables</b>                                             | <b>Total Participants</b> | <b>Participants with Missing Data*; N (%)</b> |
|--------------------------------------------------------------|---------------------------|-----------------------------------------------|
| <b>Long-term Health Conditions</b>                           | 201799                    | 8581 (4.25)                                   |
| <b>Work Sector - Employed participants on the index date</b> | 201799                    | 5579 (2.76)                                   |

\*these were missing at the index date; we have imputed these with the most recent valid data.

**Table S2: Occupation groups listed in the survey questionnaire.**

| <b>Occupation groups</b>                 | <b>Included in the analysis</b> |
|------------------------------------------|---------------------------------|
| Teaching and education                   | Yes                             |
| Health care                              | Yes                             |
| Manufacturing or construction            | Yes                             |
| Financial services incl. insurance       | No                              |
| Civil service or Local Government        | Yes                             |
| Information Technology and communication | No                              |
| Retail sector (incl. wholesale)          | Yes                             |
| Transport (incl. storage, logistic)      | No                              |
| Hospitality (e.g., hotel, restaurant)    | Yes                             |
| Social care                              | Yes                             |
| Arts, Entertainment or Recreation        | No                              |
| Food production, agriculture, farming    | No                              |
| Personal services (e.g., hairdressers)   | No                              |
| Armed forces                             | No                              |
| Other employment sector                  | No                              |

**Table S3: IMD distribution among participants who were included in the main analysis vs those who were excluded due to not having any visits 4 weeks after COVID-19**

| IMD Decile                 | Excluded participants      | Main Cohort                |
|----------------------------|----------------------------|----------------------------|
|                            | Number of Participants (%) | Number of Participants (%) |
| <b>1 (most deprived)</b>   | 1375 (5.16)                | 9483 (4.70)                |
| <b>2</b>                   | 2037 (7.64)                | 13423 (6.65)               |
| <b>3</b>                   | 2318 (8.70)                | 16286 (8.07)               |
| <b>4</b>                   | 2607 (9.78)                | 18502 (9.17)               |
| <b>5</b>                   | 2619 (9.83)                | 20055 (9.94)               |
| <b>6</b>                   | 2850 (10.69)               | 22258 (11.03)              |
| <b>7</b>                   | 2934 (11.01)               | 23244 (11.52)              |
| <b>8</b>                   | 3161 (11.86)               | 24936 (12.36)              |
| <b>9</b>                   | 3324 (12.47)               | 26499 (13.13)              |
| <b>10 (least deprived)</b> | 3424 (12.85)               | 27113 (13.44)              |

**Table S4: Number of participants experiencing Long COVID at least 4 weeks after having COVID-19, by IMD deciles.**

| <b>IMD, deciles</b>        | <b>Number of participants</b> | <b>Number of participants experiencing Long COVID, n (%)</b> |
|----------------------------|-------------------------------|--------------------------------------------------------------|
| <b>1 (most deprived)</b>   | 9483                          | 1229 (12.96)                                                 |
| <b>2</b>                   | 13423                         | 1534 (11.43)                                                 |
| <b>3</b>                   | 16286                         | 1705 (10.47)                                                 |
| <b>4</b>                   | 18502                         | 1851 (10.0)                                                  |
| <b>5</b>                   | 20055                         | 1986 (9.9)                                                   |
| <b>6</b>                   | 22258                         | 2109 (9.48)                                                  |
| <b>7</b>                   | 23244                         | 2048 (8.81)                                                  |
| <b>8</b>                   | 24936                         | 2291 (9.19)                                                  |
| <b>9</b>                   | 26499                         | 2374 (8.96)                                                  |
| <b>10 (least deprived)</b> | 27113                         | 2188 (8.07)                                                  |

1 **Table S5: Number of participants experiencing Long COVID at least 4 weeks after having COVID-19 by IMD deciles and occupational groups.**

| IMD, deciles               | Civil service or Local Government    |                                     | Manufacturing or construction   |                                     | Health care             |                                     | Teaching and education  |                                     |
|----------------------------|--------------------------------------|-------------------------------------|---------------------------------|-------------------------------------|-------------------------|-------------------------------------|-------------------------|-------------------------------------|
|                            | Total # of participants              | Participants with Long COVID, n (%) | Total # of participants         | Participants with Long COVID, n (%) | Total # of participants | Participants with Long COVID, n (%) | Total # of participants | Participants with Long COVID, n (%) |
| <b>1 (most deprived)</b>   | 488                                  | 66 (13.5)                           | 674                             | 74 (11.0)                           | 950                     | 140 (14.7)                          | 854                     | 136 (15.9)                          |
| <b>2</b>                   | 820                                  | 110 (13.4)                          | 1075                            | 116 (10.8)                          | 1343                    | 195 (14.5)                          | 1395                    | 176 (12.6)                          |
| <b>3</b>                   | 986                                  | 113 (11.5)                          | 1227                            | 129 (10.5)                          | 1609                    | 201 (12.5)                          | 1806                    | 222 (12.3)                          |
| <b>4</b>                   | 1135                                 | 123 (10.8)                          | 1447                            | 131 (9.1)                           | 1852                    | 209 (11.3)                          | 2095                    | 255 (12.2)                          |
| <b>5</b>                   | 1125                                 | 97 (8.6)                            | 1645                            | 155 (9.4)                           | 2051                    | 244 (11.9)                          | 2346                    | 295 (12.6)                          |
| <b>6</b>                   | 1232                                 | 116 (9.4)                           | 1834                            | 149 (8.1)                           | 2186                    | 227 (10.4)                          | 2758                    | 350 (12.7)                          |
| <b>7</b>                   | 1425                                 | 140 (9.8)                           | 1843                            | 150 (8.1)                           | 2408                    | 243 (10.1)                          | 2826                    | 298 (10.5)                          |
| <b>8</b>                   | 1494                                 | 134 (9.0)                           | 2064                            | 165 (8.0)                           | 2518                    | 238 (9.5)                           | 3158                    | 372 (11.8)                          |
| <b>9</b>                   | 1676                                 | 148 (8.8)                           | 2205                            | 194 (8.8)                           | 2696                    | 250 (9.3)                           | 3260                    | 349 (10.7)                          |
| <b>10 (least deprived)</b> | 1571                                 | 144 (9.2)                           | 2033                            | 190 (9.4)                           | 2760                    | 238 (8.6)                           | 3517                    | 338 (9.6)                           |
| IMD, deciles               | Hospitality (e.g. hotel, restaurant) |                                     | Retail sector (incl. wholesale) |                                     | Social care             |                                     |                         |                                     |
|                            | Total # of participants              | Participants with Long COVID, n (%) | Total # of participants         | Participants with Long COVID, n (%) | Total # of participants | Participants with Long COVID, n (%) |                         |                                     |
| <b>1 (most deprived)</b>   | 388                                  | 52 (13.4)                           | 776                             | 105 (13.5)                          | 379                     | 50 (13.2)                           |                         |                                     |
| <b>2</b>                   | 441                                  | 52 (11.8)                           | 948                             | 107 (11.3)                          | 484                     | 57 (11.8)                           |                         |                                     |
| <b>3</b>                   | 560                                  | 57 (10.2)                           | 1075                            | 111 (10.3)                          | 498                     | 58 (11.7)                           |                         |                                     |
| <b>4</b>                   | 608                                  | 60 (9.9)                            | 1158                            | 130 (11.2)                          | 583                     | 72 (12.4)                           |                         |                                     |
| <b>5</b>                   | 622                                  | 66 (10.6)                           | 1207                            | 123 (10.2)                          | 522                     | 57 (10.9)                           |                         |                                     |
| <b>6</b>                   | 650                                  | 67 (10.3)                           | 1298                            | 137 (10.6)                          | 600                     | 71 (11.8)                           |                         |                                     |
| <b>7</b>                   | 659                                  | 60 (9.1)                            | 1258                            | 122 (9.7)                           | 579                     | 51 (8.8)                            |                         |                                     |
| <b>8</b>                   | 671                                  | 73 (10.9)                           | 1372                            | 137 (10.0)                          | 564                     | 77 (13.7)                           |                         |                                     |
| <b>9</b>                   | 646                                  | 55 (8.5)                            | 1394                            | 133 (9.5)                           | 539                     | 57 (10.6)                           |                         |                                     |
| <b>10 (least deprived)</b> | 644                                  | 52 (8.1)                            | 1290                            | 117 (9.1)                           | 519                     | 42 (8.1)                            |                         |                                     |

**Table S6: Association between deprivation and experiencing Long COVID at least 4 weeks after having COVID-19, for participants residing in England.**

| IMD, deciles               | N=201,799           |         |
|----------------------------|---------------------|---------|
|                            | Odds ratio (95% CI) | P value |
| <b>1 (most deprived)</b>   | 1.41 (1.29, 1.54)   | <0.001  |
| <b>2</b>                   | 1.30 (1.20, 1.41)   | <0.001  |
| <b>3</b>                   | 1.25 (1.15, 1.35)   | <0.001  |
| <b>4</b>                   | 1.22 (1.13, 1.32)   | <0.001  |
| <b>5</b>                   | 1.18 (1.10, 1.28)   | <0.001  |
| <b>6</b>                   | 1.20 (1.11, 1.29)   | <0.001  |
| <b>7</b>                   | 1.09 (1.01, 1.17)   | 0.029   |
| <b>8</b>                   | 1.14 (1.06, 1.23)   | <0.001  |
| <b>9</b>                   | 1.13 (1.05, 1.21)   | 0.001   |
| <b>10 (least deprived)</b> | Reference           |         |

Estimates Adjusted for age, ethnicity, urban/rural, comorbid conditions, household size, country, quarter of the year, healthcare and client-facing nature of the job in the multivariable logistic regression model using the logarithm of the follow-up time as an offset term.



**Table S7: Association between deprivation and experiencing Long COVID at least 4 weeks after having COVID-19, using random-effects at country level.**

| IMD, deciles               | N=201,799           |         |
|----------------------------|---------------------|---------|
|                            | Odds ratio (95% CI) | P value |
| <b>1 (most deprived)</b>   | 1.46 (1.31, 1.63)   | <0.001  |
| <b>2</b>                   | 1.35 (1.22, 1.50)   | <0.001  |
| <b>3</b>                   | 1.29 (1.17, 1.42)   | <0.001  |
| <b>4</b>                   | 1.24 (1.18, 1.31)   | <0.001  |
| <b>5</b>                   | 1.23 (1.12, 1.36)   | <0.001  |
| <b>6</b>                   | 1.21 (1.16, 1.27)   | <0.001  |
| <b>7</b>                   | 1.11 (1.03, 1.19)   | 0.004   |
| <b>8</b>                   | 1.17 (1.09, 1.24)   | <0.001  |
| <b>9</b>                   | 1.13 (1.10, 1.17)   | <0.001  |
| <b>10 (least deprived)</b> | Reference           |         |

Estimates adjusted for age, sex, ethnicity, urban/rural, comorbid conditions, household size, healthcare and patient/client-facing nature of the job, and time (as the quarter of the year) in the multilevel logistic regression model using random-effects at country level, and the logarithm of the follow-up time as an offset term.

**Table S8: Association between deprivation and experiencing Long COVID at least 4 weeks after having COVID-19, excluding those who only had self-reported COVID-19 results.**

| IMD, deciles               | N= 164,469        |         |
|----------------------------|-------------------|---------|
|                            | OR (95% CI)       | P value |
| <b>1 (most deprived)</b>   | 1.52 (1.37, 1.69) | <0.001  |
| <b>2</b>                   | 1.35 (1.22, 1.49) | <0.001  |
| <b>3</b>                   | 1.33 (1.21, 1.46) | <0.001  |
| <b>4</b>                   | 1.23 (1.12, 1.35) | <0.001  |
| <b>5</b>                   | 1.27 (1.16, 1.39) | <0.001  |
| <b>6</b>                   | 1.16 (1.06, 1.27) | 0.001   |
| <b>7</b>                   | 1.09 (0.99, 1.19) | 0.069   |
| <b>8</b>                   | 1.14 (1.05, 1.25) | 0.002   |
| <b>9</b>                   | 1.09 (1.00, 1.19) | 0.044   |
| <b>10 (least deprived)</b> | Reference         |         |

Estimates adjusted for age, sex, ethnicity, urban/rural, comorbid conditions, household size, healthcare and patient/client-facing nature of the job, and time (as the quarter of the year) in the multilevel logistic regression model using random-effects at country level, and the logarithm of the follow-up time as an offset term.
